# Supplementary material for: Syntheses, crystal structures of a series of novel alkali metal or alkaline earth metal phosphites
Source: Royal Society of Chemistry journal article supplement (doi:10.1039/c3ce26885c), 2013-01-01
Supplement: c3ce26885c.pdf [file c3ce26885c.pdf]

# Syntheses, Crystal Structures of A Series of Novel Alkali Metal or Alkaline Earth Metal Phosphites

Xi-Jia Wang, Jian-Han Zhang, Jun-Ling Song, Fang Kong and Jiang-Gao Mao\*

## Supporting Information

Figure S1. Simulated and measured XRD powder patterns of (a)  $\text{NaIn}_3(\text{HPO}_3)_5(\text{H}_2\text{O})_4$ , (b)  $\text{RbIn}(\text{HPO}_3)_2$ , (c)  $\text{CsIn}(\text{HPO}_3)_2$ , (d)  $\text{Ba}_3\text{Al}_2(\text{HPO}_3)_6$ , (e)  $\text{Ba}_3\text{Ga}_2(\text{HPO}_3)_6$  and (f)  $\text{Ba}_3\text{In}_2(\text{HPO}_3)_6$ .

Figure S2. Views of  $\text{RbIn}(\text{HPO}_3)_2$  (a) and  $\text{CsIn}(\text{HPO}_3)_2$  (b) down the  $b$  axis. All H atoms are omitted for clarity.

Figure S3. UV-Vis absorption spectra of  $\text{Ba}_3\text{Al}_2(\text{HPO}_3)_6$ ,  $\text{Ba}_3\text{Ga}_2(\text{HPO}_3)_6$  and  $\text{Ba}_3\text{In}_2(\text{HPO}_3)_6$

Figure S4. IR spectra of (a)  $\text{NaIn}_3(\text{HPO}_3)_5(\text{H}_2\text{O})_4$ , (b)  $\text{RbIn}(\text{HPO}_3)_2$  (c)  $\text{CsIn}(\text{HPO}_3)_2$  (d)  $\text{Ba}_3\text{Al}_2(\text{HPO}_3)_6$ , (e)  $\text{Ba}_3\text{Ga}_2(\text{HPO}_3)_6$  and (f)  $\text{Ba}_3\text{In}_2(\text{HPO}_3)_6$ .

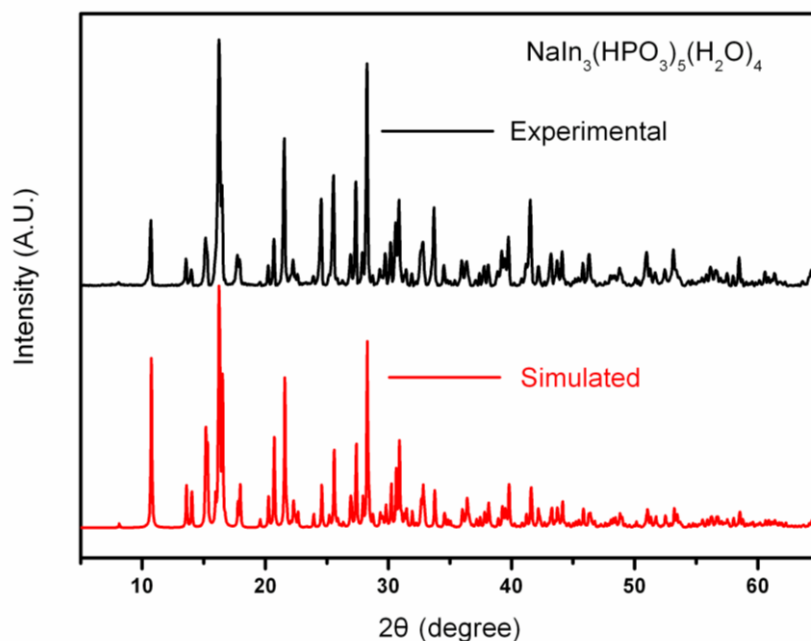

(a)

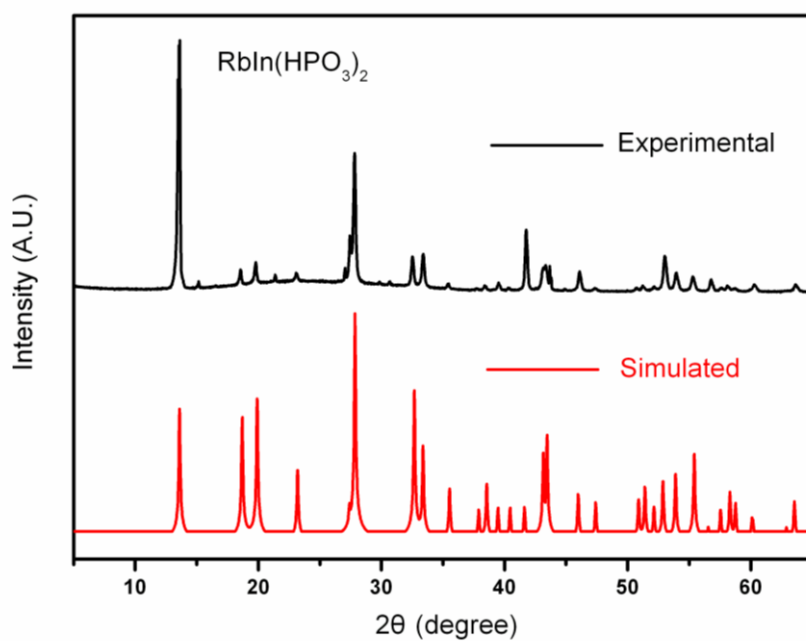

(b)

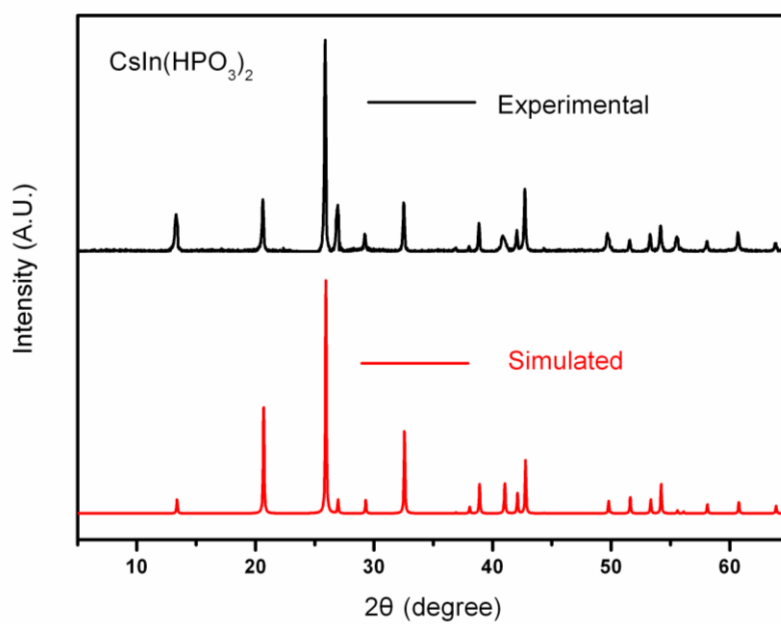

(c)

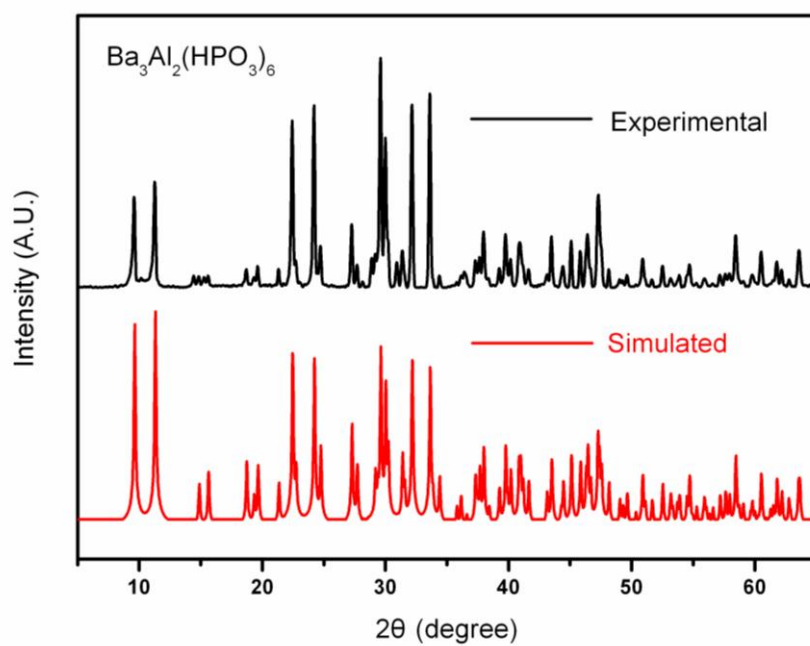

(d)

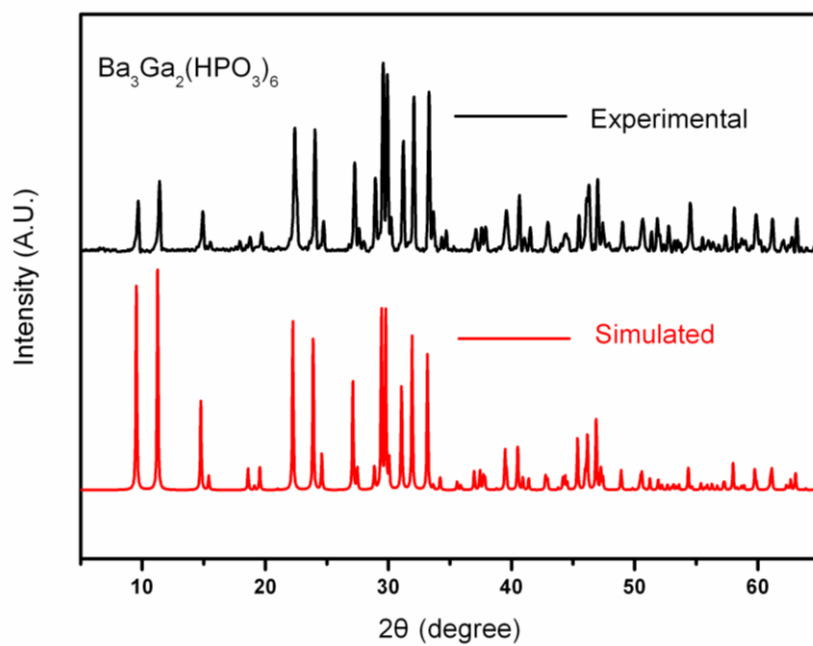

(e)

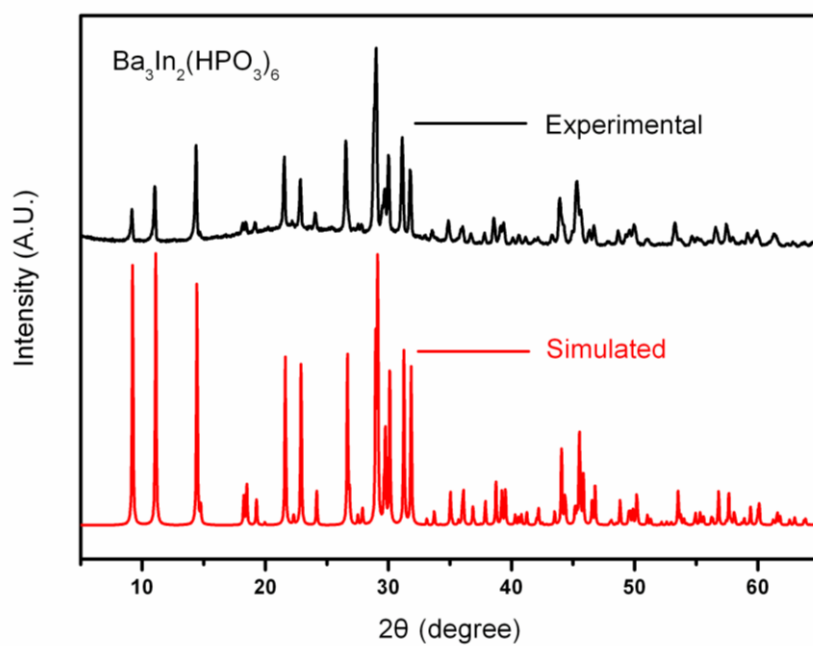

(f)

Figure S1. Experimental and simulated powder X-ray diffraction patterns for (a)  $\text{NaIn}_3(\text{HPO}_3)_5(\text{H}_2\text{O})_4$ , (b)  $\text{RbIn}(\text{HPO}_3)_2$ , (c)  $\text{CsIn}(\text{HPO}_3)_2$ , (d)  $\text{Ba}_3\text{Al}_2(\text{HPO}_3)_6$ , (e)  $\text{Ba}_3\text{Ga}_2(\text{HPO}_3)_6$  and (f)  $\text{Ba}_3\text{In}_2(\text{HPO}_3)_6$ .

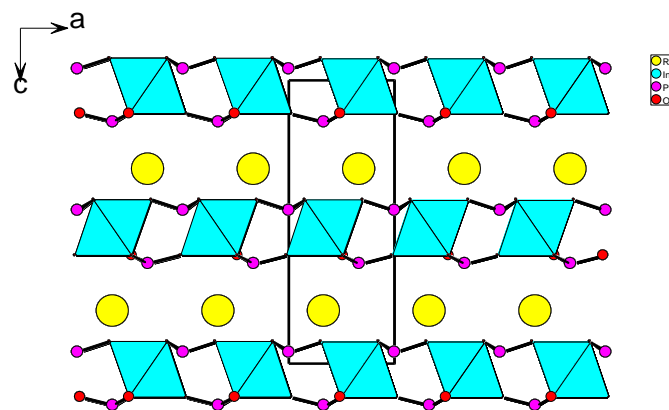

(a)

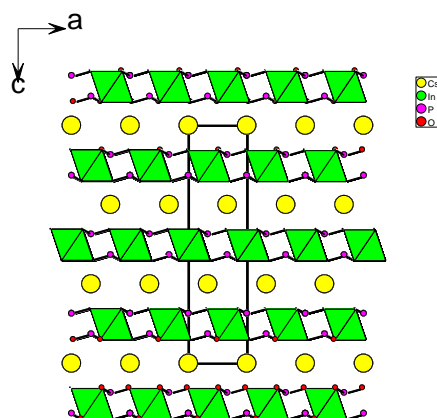

(b)

Figure S2. Views of RbIn(HPO<sub>3</sub>)<sub>2</sub> (a) and CsIn(HPO<sub>3</sub>)<sub>2</sub> (b) down the *b* axis. All H atoms are omitted for clarity.

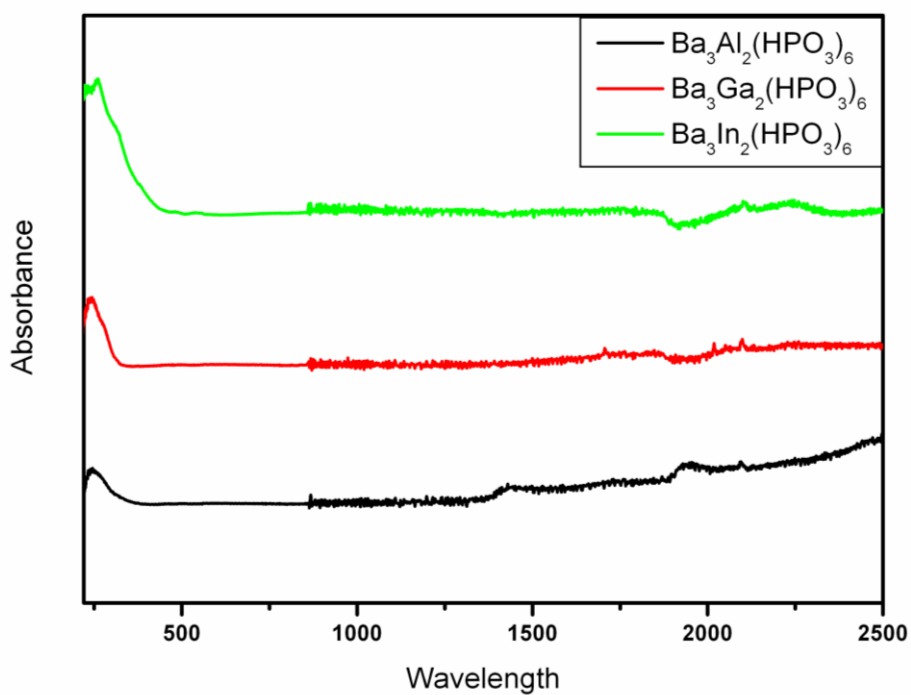

Figure S3. UV absorption spectra of Ba<sub>3</sub>Al<sub>2</sub>(HPO<sub>3</sub>)<sub>6</sub>, Ba<sub>3</sub>Ga<sub>2</sub>(HPO<sub>3</sub>)<sub>6</sub> and Ba<sub>3</sub>In<sub>2</sub>(HPO<sub>3</sub>)<sub>6</sub>.

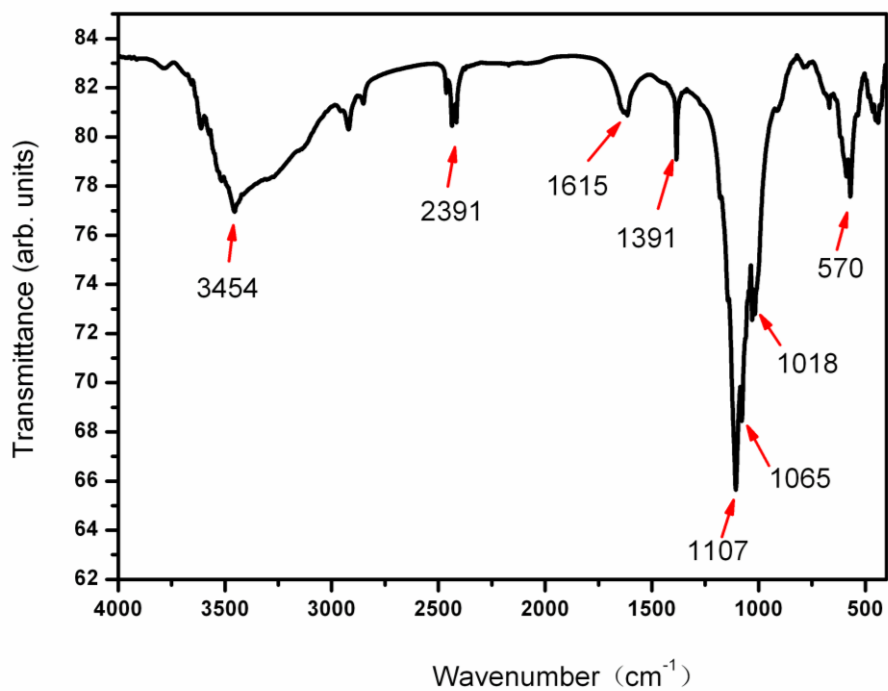

(a)

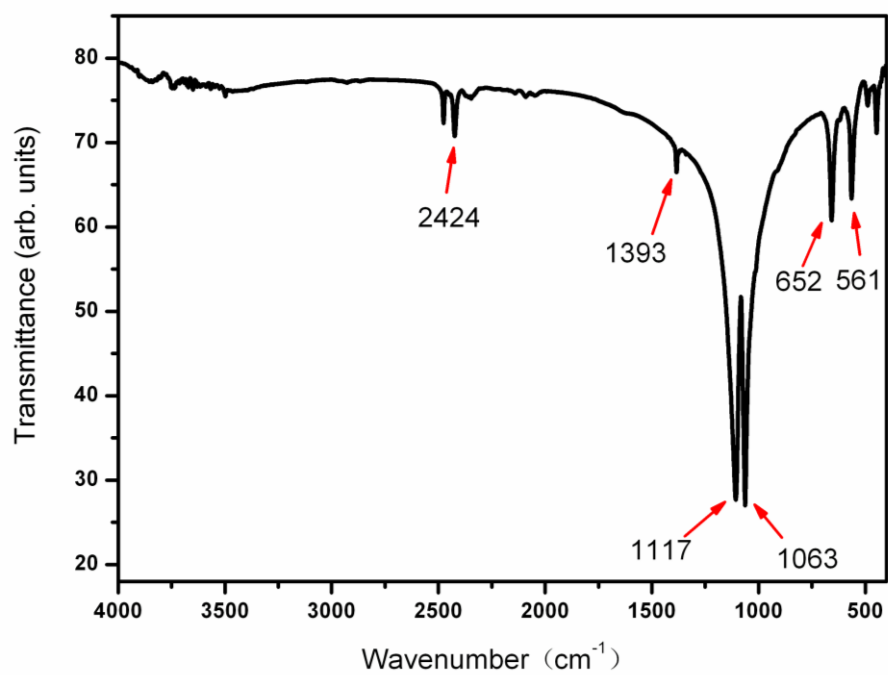

(b)

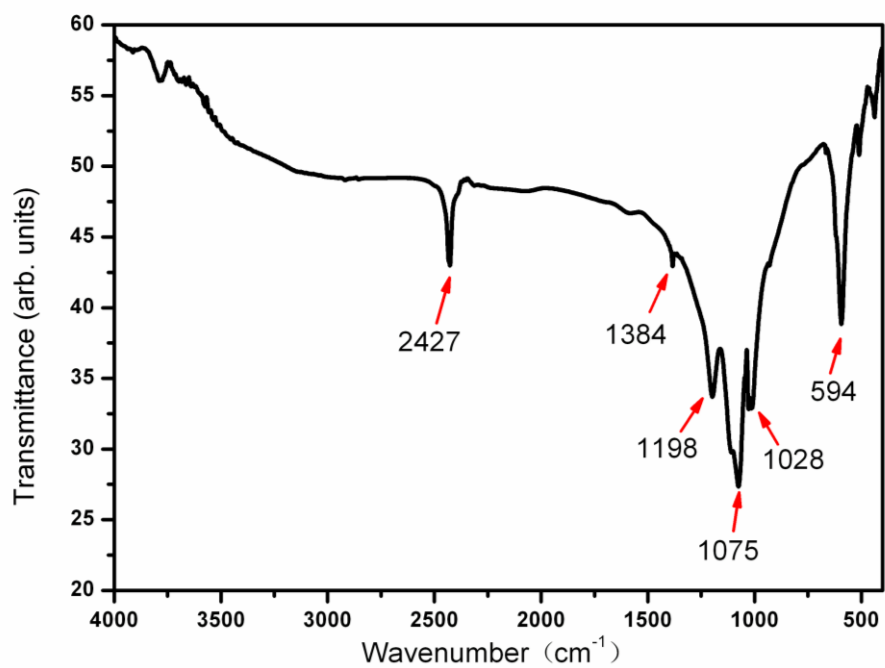

(c)

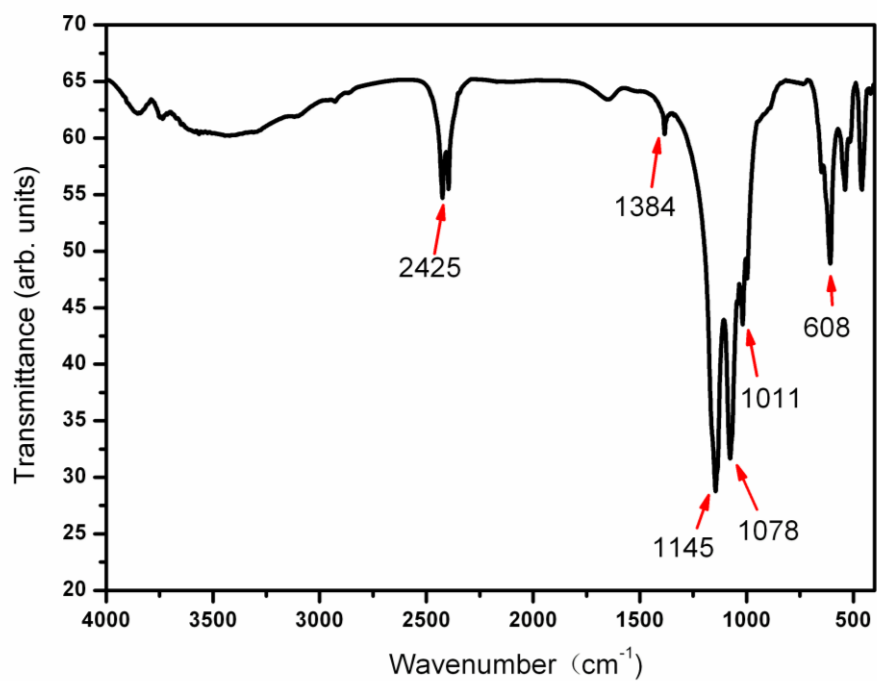

(d)

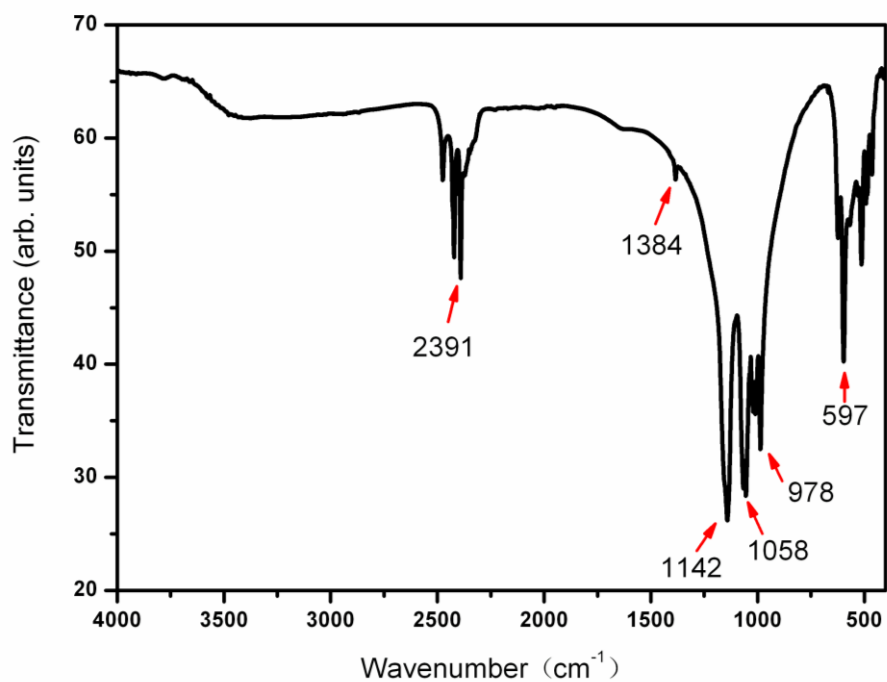

(e)

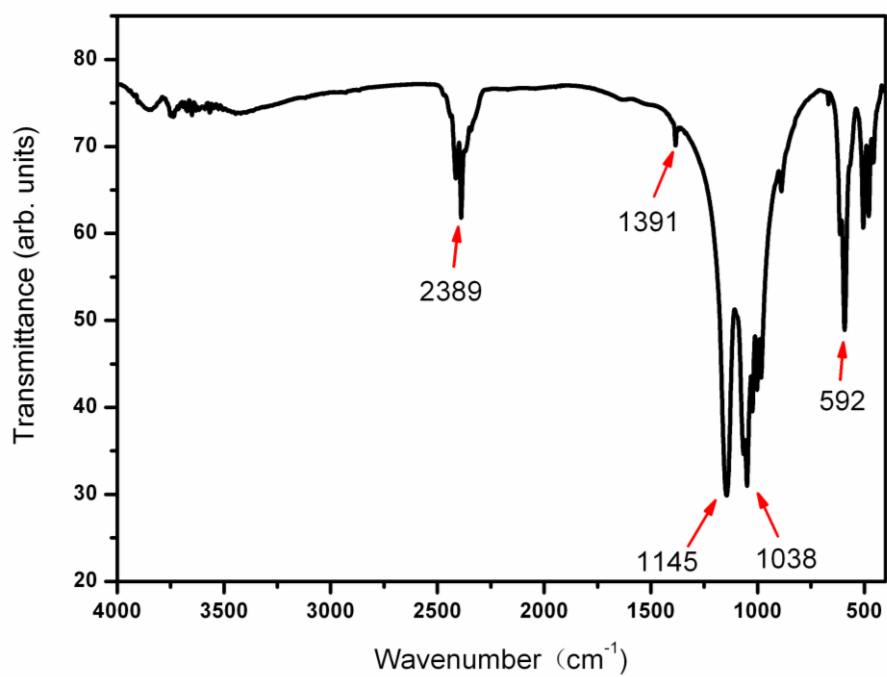

(f)

Figure S4. The infrared spectra of NaIn<sub>3</sub>(HPO<sub>3</sub>)<sub>5</sub>(H<sub>2</sub>O)<sub>4</sub> (a), RbIn(HPO<sub>3</sub>)<sub>2</sub> (b), CsIn(HPO<sub>3</sub>)<sub>2</sub> (c), Ba<sub>3</sub>Al<sub>2</sub>(HPO<sub>3</sub>)<sub>6</sub> (d), Ba<sub>3</sub>Ga<sub>2</sub>(HPO<sub>3</sub>)<sub>6</sub> (e) and Ba<sub>3</sub>In<sub>2</sub>(HPO<sub>3</sub>)<sub>6</sub> (f).
